# Supplementary material
Source: Research Square preprint supplement (doi:10.21203/rs.3.rs-9458131/v1)
Supplement: Supplementary file 1 [file 987617c47f503ef019a0ad93.pdf]

## CARE Checklist of information to include when writing a case report

*Manuscript: Mast cell-mediated inflammatory hubs drive progressive multi-system pathology: a 22-year case report with therapeutic validation*

| Topic                    | Item | Checklist item description                                                                             | Reported on line |
|--------------------------|------|--------------------------------------------------------------------------------------------------------|------------------|
| Title                    | 1    | The diagnosis or intervention of primary focus followed by the words "case report"                     | 1                |
| Key Words                | 2    | 2 to 5 key words that identify diagnoses or interventions in this case report, including "case report" | 19               |
| Abstract                 | 3a   | Introduction: What is unique about this case and what does it add to the scientific literature?        | 11               |
|                          | 3b   | Main symptoms and/or important clinical findings                                                       | 13               |
|                          | 3c   | The main diagnoses, therapeutic interventions, and outcomes                                            | 13, 15           |
|                          | 3d   | Conclusion: What is the main "take-away" lesson(s) from this case?                                     | 17               |
| Introduction             | 4    | One or two paragraphs summarizing why this case is unique (may include references)                     | 23-31            |
| Patient Information      | 5a   | De-identified patient specific information                                                             | 37               |
|                          | 5b   | Primary concerns and symptoms of the patient                                                           | 37, 39           |
|                          | 5c   | Medical, family, and psycho-social history including relevant genetic information                      | 37, 39           |
|                          | 5d   | Relevant past interventions with outcomes                                                              | 43-45            |
| Clinical Findings        | 6    | Describe significant physical examination (PE) and important clinical findings                         | 37               |
| Timeline                 | 7    | Historical and current information from this episode of care organized as a timeline                   | 79-97 (Table 1)  |
| Diagnostic Assessment    | 8a   | Diagnostic testing (such as PE, laboratory testing, imaging, surveys)                                  | 37, 39, 57       |
|                          | 8b   | Diagnostic challenges (such as access to testing, financial, or cultural)                              | 39, 123          |
|                          | 8c   | Diagnosis (including other diagnoses considered)                                                       | 37, 57           |
|                          | 8d   | Prognosis (such as staging in oncology) where applicable                                               | Not applicable   |
| Therapeutic Intervention | 9a   | Types of therapeutic intervention (such as pharmacologic, surgical, preventive, self-care)             | 63, 65, 69, 71   |
|                          | 9b   | Administration of therapeutic intervention (such as dosage, strength, duration)                        | 63, 65, 71       |
|                          | 9c   | Changes in therapeutic intervention (with rationale)                                                   | 63-71            |
| Follow-up and Outcomes   | 10a  | Clinician and patient-assessed outcomes (if available)                                                 | 65, 69, 71       |
|                          | 10b  | Important follow-up diagnostic and other test results                                                  | 57, 71           |
|                          | 10c  | Intervention adherence and tolerability (How was this assessed?)                                       | 65, 71           |
|                          | 10d  | Adverse and unanticipated events                                                                       | 67               |
| Discussion               | 11a  | A scientific discussion of the strengths AND limitations                                               | 121-123          |

|                     |     |                                                                                                        |                    |
|---------------------|-----|--------------------------------------------------------------------------------------------------------|--------------------|
|                     |     | associated with this case report                                                                       |                    |
|                     | 11b | Discussion of the relevant medical literature with references                                          | 103, 107, 111, 115 |
|                     | 11c | The scientific rationale for any conclusions (including assessment of possible causes)                 | 103-119            |
|                     | 11d | The primary "take-away" lessons of this case report (without references) in a one paragraph conclusion | 127                |
| Patient Perspective | 12  | The patient should share their perspective in one to two paragraphs on the treatment(s) they received  | 131-135            |
| Informed Consent    | 13  | Did the patient give informed consent? Please provide if requested                                     | Yes (line 145)     |
